# Supplementary material
Source: publisher figshare collection journal article supplement (https://karger.figshare.com/ndownloader/files/8478224)
Supplement: Supplementary file 1 [file 8478224]

| Appendix Table 1. Adjusted HRs for cataract in patients with CKD after matching for age and gender | | | | |
| --- | --- | --- | --- | --- |
|  |  |  | |  |
| Variables |  | **Hazard Ratio 95% confidence interval** | | ***P-*value** |
| Chronic Renal Insufficiency |  | 1.90 | 1.76-2.06 | **<0.001** |
| Socioeconomic status |  |  |  |  |
| Low |  | 1 | -- | -- |
| Moderate |  | 1.08 | 1.00-1.17 | 0.049 |
| High |  | 0.60 | 0.44-0.81 | **<0.001** |
| Urbanization level |  |  |  |  |
| Urban |  | 1 | -- | -- |
| Suburban |  | 1.09 | 0.99-1.19 | 0.068 |
| Rural |  | 0.99 | 0.90-1.09 | 0.797 |
| Charlson Comorbidity Index |  |  |  |  |
| 0 |  | 1 | -- | -- |
| 1 |  | 1.13 | 1.03-1.25 | 0.014 |
| ≥ 2 |  | 1.15 | 1.03-1.28 | 0.013 |
| Diabetes |  | 1.33 | 1.23-1.45 | **<0.001** |
| Chronic liver disease |  | 1.02 | 0.92-1.12 | 0.773 |
| Hypertension |  | 1.05 | 0.97-1.13 | 0.242 |
| Coronary artery disease |  | 1.05 | 0.97-1.14 | 0.270 |
| Hyperlipidemia |  | 1.08 | 0.99-1.17 | 0.077 |
| Malignancies |  | 0.96 | 0.81-1.13 | 0.607 |
| Smoking |  | 0.59 | 0.08-4.16 | 0.592 |
| Chronic obstructive pulmonary disease |  | 1.06 | 0.98-1.16 | 0.136 |
| Obesity |  | 1.65 | 0.74-3.69 | 0.222 |
| History of alcohol intoxication |  | 0.85 | 0.55-1.31 | 0.467 |
|  |  |  |  |  |
